# Supplementary material
Source: MDPI journal article supplement (https://www.mdpi.com/2075-163X/10/11/1021)
Supplement: s1 [file s1]

Archive with 2 entries (2 files):
- 201026yano_supplementary_files/201026yano_FigureS1.pdf
- 201026yano_supplementary_files/201026yano_supplementaryTableS1.xlsx
