# Supplementary material
Source: MDPI journal article supplement (https://www.mdpi.com/2075-163X/10/11/1021)
Supplement: s1 [file s1 › 201026yano_supplementary_files/201026yano_supplementaryTableS1.xlsx]

## Sheet: Site 225
Table S1-1. Major, trace and rare-earth elements data of DSDP Site 225
Core- Sec.	1-1	3-2	4-5	8-3	9-5	11-5	12-1	14-2	17-4	18-3	19-4	23-1	23-2	23-3	26-1
Interval	69-78	68-70	84-86	74-76	70-72	64-66	97-99	112-115	70-72	41-43	96-98	91-93	95-97	43-45	39-43
Depth (mbsf)	0.69	19.82	26.04	48.74	60.7	75.69	77	88.62	118.2	125.41	136.46	167.91	169.45	170.43	194.39
SiO2 (wt.%)	11.8	14.9	17.3	19.7	19.3	21.3	18.9	17.4	30	16.1	25.2	46.3	45	38.8	47.9
TiO2	0.29	0.34	0.34	0.42	0.36	0.33	0.35	0.3	0.56	0.29	0.29	0.71	0.73	0.57	0.54
Al2O3	3.62	4.49	6.39	6.22	7.02	6.42	5.79	6	10.2	5.76	5.86	15.8	14.8	11.7	10.1
Fe2O3*	2.34	2.67	6.21	3.62	5.01	4.6	6.38	6.81	5.31	6.34	5.17	8.31	6.94	5.25	4.66
MnO	0.15	0.18	0.14	0.26	0.13	0.09	0.22	0.09	0.17	0.16	0.14	0.08	0.09	0.11	0.09
MgO	3.94	4.58	2.35	3.81	2.35	3.03	5.64	2.05	4.42	1.73	1.2	3.76	4.57	7.69	6.72
CaO	40.7	37.4	32.4	33.7	28.5	33.3	33.3	34.5	22	39.6	33	3.83	5.4	10.4	6.69
Na2O	0.1	0.18	0.9	0.4	0.92	1.23	0.69	1.38	1.64	1	1.74	4.73	4.79	3.3	3.41
K2O	0.04	0.1	0.42	0.18	0.33	0.59	0.31	0.58	0.65	0.48	0.78	2.5	2.21	1.57	1.83
P2O5	0.22	0.2	0.25	0.24	0.27	0.26	0.25	0.29	0.22	0.22	0.16	0.15	0.21	0.15	0.37
Sc (ppm)	4.6	6.6	8.11	7.26	7.7	7.41	6.67	7.33	12.3	6.27	6.75	18.2	17.8	14.7	13.1
V	44.4	52.8	490	72.6	367	122	107	514	104	314	206	171	109	85.9	85.1
Cr	29.6	33.7	48.1	44.5	46.4	39.4	38.8	36.4	70.4	31.6	32.1	80.8	84.5	66.8	61.2
Co	7.58	9.89	22.3	14	21.4	16.4	14.5	16.5	20.3	14	14.7	40.9	28.9	17	21.6
Ni	25.4	32.1	88.4	47.5	75.8	45.6	37.5	58.5	58.7	50.1	45.1	71.4	64.2	39.9	40.7
Cu	21.2	19	67.4	30.6	60.4	41.8	52.9	47.9	56.7	40.7	42.9	97.1	84.2	54.4	73.7
Zn	94.6	78	278	119	130	84.4	118	69.1	132	92	43.9	116	69.3	111	61.6
As	8.51	2.61	49	6.79	16.1	12.9	10.9	23.8	5.63	21.9	13.6	17.8	6.04	3.73	3.42
Rb	13.7	20	23	25.1	25	23.1	20.9	18.1	42.4	15.7	18.1	52.8	48	35.2	40.7
Sr	841	696	953	811	831	1092	770	933	652	768	836	120	176	181	127
Zr	31.6	38.1	37.2	41.7	35.1	30.8	33.6	26.6	55.8	24.9	24.5	55.1	52.8	39.8	40.6
Nb	4.04	4.8	3.6	5.08	3.34	3.24	3.63	2.43	6.23	2.44	2.34	5.85	6	4.21	4.83
Mo	0.52	0.73	131	1.22	158	27.5	27.5	189	1.33	58	60.8	2.55	6	2.42	2.12
Cs	0.62	0.97	1.02	1.2	1.15	1.2	1.03	0.85	2.22	0.74	0.77	2.62	2.26	1.49	2.08
Ba	58.9	81.2	764	105	547	210	189	478	146	354	345	201	197	141	143
Hf	0.87	1.06	0.97	1.24	0.96	0.87	0.92	0.7	1.63	0.7	0.69	1.7	1.57	1.19	1.14
Ta	0.26	0.32	0.24	0.35	0.23	0.22	0.24	0.17	0.46	0.16	0.15	0.4	0.39	0.28	0.31
Pb	8.63	6.13	10.5	7.34	7.49	5.04	5.06	3.97	9.36	4.84	3.64	6.43	7.46	4.98	5.51
Th	1.41	2.06	2.02	2.35	2.09	1.96	1.85	1.45	3.57	1.32	1.2	3.83	3.47	2.59	2.6
U	0.83	1.45	19.1	2.23	16	11.4	5.36	19.5	3.1	14.5	14.4	5.84	4.12	3.62	5.24
La (ppm)	6.31	8.81	10.8	10.1	10.8	9.73	9.57	8.12	15.3	7.73	8.81	15.5	18.4	14.7	17.1
Ce	13.7	18.9	23	22.1	22.6	20.9	20.5	17.7	34.4	15.7	18.4	31.5	42.1	32	35.3
Pr	1.59	2.25	2.82	2.68	2.8	2.46	2.49	2.06	4.05	2.02	2.15	4.18	5.19	3.89	4.46
Nd	6.46	9.31	11.7	10.6	11.5	10.1	10.1	9.1	16.7	8.45	9.17	17.8	21.7	16.3	19.4
Sm	1.41	1.9	2.5	2.26	2.47	2.23	2.08	1.88	3.55	1.75	2.04	3.93	4.89	3.69	4.23
Eu	0.34	0.47	0.57	0.58	0.62	0.55	0.58	0.49	0.88	0.48	0.53	0.98	1.25	0.94	1.11
Gd	1.3	1.82	2.38	2.23	2.47	2.14	2.03	1.97	3.54	1.86	2.15	3.53	4.58	3.57	4.19
Tb	0.2	0.27	0.36	0.34	0.36	0.32	0.3	0.29	0.52	0.28	0.33	0.54	0.72	0.53	0.64
Dy	1.19	1.59	2.14	1.98	2.19	1.91	1.74	1.73	3.06	1.7	1.97	3.08	4.17	3.2	3.87
Ho	0.24	0.32	0.44	0.41	0.44	0.41	0.36	0.37	0.64	0.36	0.4	0.6	0.84	0.66	0.8
Er	0.69	0.93	1.28	1.16	1.28	1.16	1.06	1.05	1.78	1.06	1.18	1.7	2.4	1.83	2.24
Tm	0.1	0.12	0.17	0.15	0.17	0.15	0.14	0.14	0.24	0.14	0.16	0.23	0.33	0.24	0.29
Yb	0.62	0.85	1.19	1.09	1.18	1.05	1	0.99	1.63	0.95	1.08	1.65	2.18	1.63	1.91
Lu	0.09	0.13	0.18	0.16	0.17	0.15	0.14	0.15	0.24	0.14	0.16	0.24	0.31	0.23	0.28
Y	6.42	8.92	11.3	10.4	12.1	10.1	9.53	8.95	15.4	9.47	10.8	14.3	20.6	16.6	21.4
ΣREY	40.6	56.6	70.8	66.2	71.2	63.4	61.6	55	102	52.1	59.3	99.7	130	100	117
TS (wt.%)	0.782653	0.816023	6.94078	0.708702	2.99435	3.3024	3.23495	4.51206	0.838267	4.7571	3.63085	3.15548	2.40997	2.35286	1.924
Fe2O3*: total iron as Fe2O3.

## Sheet: Site 380
Table S1-2. Major, trace and rare-earth elements data of DSDP Site 380A
Core- Sec.	69R-2	69R-3	69R-4	69R-5	70R-3	70R-4	70R-4	70R-5	71R-2	71R-2	71R-3	71R-3	71R-4	71R-5	73R-1	73R-2	73R-2	73R-3	74R-2	74R-2	74R-3	74R-3	75R-1	75R-1	75R-2	75R-2	76R-1	76R-1	76R-2	76R-2	76R-4	76R-4	77R-2	77R-2	77R-3	77R-3	78R-1	78R-1	79R-1	79R-1	79R-2	79R-2	80R-1	80R-1	80R-1
Interval	126-130	125-127	125-127	130-132	55.0-57.0	75.0-77.0	125.0-128.0	75.0-77.0	25-27	75.0-77.0	61-63	120.0-122.0	75-77	125.0-127.0	130-132	30.0-32.0	130-132	37.0-39.0	20-22	68.0-70.0	20-22	70.0-72.0	25-27	76.0-78.0	25-27	75.0-77.0	25-27	75.0-77.0	23-26	75.0-77.0	24-27	74.0-76.0	25-27	75.0-78.0	24-26	75.0-77.0	25-27	75.0-77.0	22-26	75.0-77.0	75-78	125.0-128.0	29-32	80-82	130.0-132.0
Depth (mbsf)	971.76	973.25	974.75	976.3	982.05	983.75	984.25	985.25	989.75	990.25	991.61	992.2	993.25	995.25	1008.3	1008.8	1009.8	1010.37	1018.2	1018.68	1019.7	1020.2	1026.25	1026.76	1027.75	1028.25	1035.75	1036.25	1037.23	1037.75	1040.24	1040.74	1046.75	1047.25	1048.24	1048.75	1054.75	1055.25	1064.22	1064.75	1066.25	1066.75	1073.79	1074.3	1074.8
SiO2 (wt.%)	45.7	56.7	52.7	52.2	49.1	49.7	52.7	50.7	52.3	52.6	44.9	53.4	52	51.5	51.6	54.3	53.4	54.7	52.2	54.7	54.6	54.4	48.8	50.8	53.3	51.5	44.2	54.9	55.7	53.6	49.4	53.8	55	52.2	56	48	48.6	52.2	53.4	54.6	57.4	52.7	53.7	53.1	56.6
TiO2	0.6	0.69	0.71	0.69	0.67	0.68	0.72	0.69	0.72	0.74	0.62	0.7	0.74	0.73	0.73	0.73	0.72	0.74	0.76	0.77	0.73	0.72	0.65	0.73	0.75	0.75	0.63	0.74	0.68	0.73	0.64	0.7	0.7	0.69	0.67	0.66	0.62	0.67	0.66	0.61	0.63	0.59	0.77	0.69	0.78
Al2O3	14.7	15	16	16.1	16	15.8	15.8	15.7	17.1	17	15.1	16.3	17.2	17	17.2	16.4	16.8	16.8	16.6	17.7	16.6	16.5	16.2	16.7	16.4	16.8	14.3	17.9	16.2	16.4	14.9	16.1	14.7	15	15.4	14.6	15.2	15.6	15.6	14.7	14.4	15	16.4	15.7	16.9
Fe2O3*	6.67	5.24	6.46	6.34	6.77	6.46	6.51	6.76	6.49	6.76	6.04	6.12	6.54	6.41	6.77	6.19	6.31	6.41	6.28	6.44	6	6.79	6.25	6.77	6.88	6.62	6.18	6.31	5.8	6.68	5.79	6.11	6.34	6.55	5.71	5.99	6.53	6.74	6.58	5.93	6.15	6.13	6.91	6.46	6.72
MnO	0.12	0.07	0.07	0.09	0.07	0.08	0.09	0.08	0.06	0.08	0.11	0.11	0.06	0.08	0.08	0.08	0.08	0.08	0.08	0.07	0.07	0.09	0.09	0.07	0.08	0.08	0.09	0.07	0.07	0.08	0.08	0.21	0.09	0.09	0.11	0.08	0.17	0.13	0.09	0.07	0.09	0.1	0.1	0.07	0.09
MgO	3.91	2.29	2.64	3.21	2.8	2.91	2.85	2.93	2.45	2.66	3.08	2.47	2.61	2.55	2.41	2.53	2.53	2.44	2.72	2.53	2.43	2.63	2.6	2.7	2.71	2.43	3.22	2.53	2.45	2.64	2.69	2.52	2.81	2.89	2.28	3.59	2.98	2.8	2.17	2.07	2.08	2.22	2.43	2.49	2.34
CaO	7.83	5.99	5.34	4.94	6.68	6.34	5.74	6.5	4.63	3.99	10.3	5.11	5.04	5.12	4.48	3.86	4.34	3.41	5.03	2.53	3.96	3.43	6.94	5.98	3.86	5.43	10.3	3.17	4.16	4.11	8.31	4.89	5.1	5.77	4.42	7.78	6.71	4.77	3.95	4.56	2.76	5.31	3.25	5.38	1.7
Na2O	2.18	2.59	2.56	2.22	1.99	2.09	2.26	2.11	2.19	2.13	2.02	2.39	2.1	2.08	2.12	2.56	2.45	2.48	2.29	2.37	2.68	2.37	2.11	2.15	2.4	2.07	2.2	2.48	2.7	2.51	2.29	2.18	2.57	2.31	2.49	2.13	2.21	2.01	1.76	2	1.97	2.08	1.89	2.26	2.02
K2O	2.44	2.77	2.83	2.8	2.85	2.71	2.69	2.71	2.68	2.9	2.18	2.61	2.62	2.56	2.74	2.79	2.82	2.89	2.82	3.03	2.83	2.88	2.65	2.91	2.7	2.67	2.45	2.98	2.85	2.87	2.63	2.8	2.59	2.54	2.63	2.31	2.39	2.35	2.18	2.29	2.19	2.23	2.44	2.48	2.41
P2O5	0.15	0.11	0.13	0.17	0.16	0.2	0.14	0.1	0.1	0.11	0.22	0.1	0.13	0.14	0.12	0.11	0.11	0.09	0.13	0.1	0.11	0.1	0.27	0.12	0.13	0.25	0.13	0.09	0.11	0.11	0.13	0.14	0.13	0.13	0.11	0.12	0.14	0.14	0.14	0.15	0.14	0.17	0.09	0.13	0.09
Sc (ppm)	15	13.8	15.9	17.1	18.6	20.9	16.9	16.8	17.8	19.8	14	17.4	17.3	20.7	17.5	18.4	16.9	16.8	18.8	18.9	15.7	17.2	18.1	18.5	17.3	21.9	17.3	16.1	14.8	16.8	14.2	16.8	15.1	14.6	15.5	16.6	16.7	15.9	17.5	14.8	15.3	15.5	17.4	15.7	18.3
V	132	92.9	121	135	143	130	116	121	160	147	129	124	158	173	155	127	142	124	151	125	128	121	137	147	140	156	138	111	119	117	110	118	111	107	121	118	134	123	155	133	120	130	133	132	125
Cr	97.3	115	129	128	125	149	148	140	143	141	112	126	135	146	124	128	132	126	153	138	129	138	117	144	138	142	121	118	115	128	106	131	128	125	109	136	119	123	119	107	120	118	138	130	132
Co	26.1	16.3	21.1	23.3	27.2	25.7	20.3	21.8	24	27	21.6	20.5	20.2	26.2	21	17.9	17.8	17.9	18.3	18.6	17.1	19.4	23.4	22.9	18.5	20.8	18.9	17	16.6	18.6	18.7	18.7	16.5	20.2	16.7	22.9	23.4	21.5	25.5	22.8	22	24.6	17.7	18.8	19.1
Ni	110	93.5	134	117	124	119	105	128	116	113	100	88.4	89.6	104	85.9	79.5	90.1	81.9	108	81.5	89.3	91.1	97.1	104	87.1	88.3	76.6	71.1	86.2	83.2	82	86.2	78.4	93.7	71.8	104	107	90	93.4	106	99.7	106	84.4	94.7	72.5
Cu	63.1	29.5	45.7	52.4	65.1	54.1	39.9	47.4	62.8	60.5	58.3	42.3	45.6	64.2	59.2	37.1	44.1	42.4	45.7	42	35.4	39.7	72.9	57.8	38.4	45.5	46.2	37.1	31.6	35.4	40.6	39	28.5	34	32.3	42.8	61.5	50.6	64.3	66.7	49.6	59.5	31.8	38.1	35.4
Zn	84.4	82.2	104	98.6	76.7	93.4	98.7	109	110	107	90.8	89.1	98.3	115	88.7	85.8	87.4	89.1	79	98.6	102	94.5	91	86.9	82.4	85.1	70.5	93.8	91.8	97.5	92.7	92	86	103	77.8	92	96.2	97.7	95.6	99.6	87.7	100	105	88.9	90.2
As	11.3	8.93	13.2	10.8	14.3	11.4	10.9	12.2	15.7	12.7	10.5	7.21	12.2	11.4	11.9	6.98	9.43	6.12	11.8	8.9	11.3	8.69	9.32	11.5	9.21	10.2	13.3	7.98	13.7	8.2	11.1	8.18	8.27	9.18	7.7	10.3	9.66	8.55	11.3	9.21	9.82	10.9	8.25	10.9	8.3
Rb	95.4	108	118	125	110	126	116	132	116	129	95.4	119	116	122	115	131	124	135	118	148	127	137	118	125	112	111	107	133	126	134	110	131	105	112	105	113	109	105	91.8	115	102	118	106	112	106
Sr	309	297	256	247	343	357	279	345	249	265	415	332	277	312	254	227	248	226	230	180	234	225	343	221	196	236	369	180	239	217	348	243	234	293	266	290	352	313	193	288	161	283	190	314	150
Zr	66	48.1	56.4	61.1	63.7	64.3	60	57.6	79.3	83.9	69	66	80.4	85	81.4	66.5	62.5	57.5	72.6	62.5	58.1	59.9	69.2	75.6	78.6	83.5	71.5	52	48.8	56.8	60.2	55.9	57.1	53.4	66.8	64.2	63	72.1	81.8	66.8	65.2	64.1	77.4	65.8	82.9
Nb	9.41	10.6	11.1	11.3	9.84	11.4	11.7	11.5	11	12.4	9.44	12	12.5	12.8	11.5	12.3	11.7	11.8	11.7	13.4	12.5	12.8	10.9	11.4	11.4	11.8	10.3	13.5	11.8	12.4	10.6	11.7	10.7	10.3	10.6	11	9.97	10.8	10.2	10.4	9.86	10.5	12.1	11.6	12.7
Mo	12.5	1.68	3.73	6.12	11.3	2.5	2.12	11	9.88	10.4	5.47	1.32	6.26	3.02	4.73	1.03	1.63	1.04	2.39	1.17	2.77	1.08	6.79	8.38	3.55	6.27	7.57	0.95	3.59	0.93	3.99	1.06	1.01	3.38	3.56	7.7	7.93	6.28	3.91	8.8	4.24	18.6	1.06	3.87	1.1
Cs	7.33	7.51	8.96	9.13	8.66	9.66	8.77	9.36	7.98	8.56	6.54	7.48	8.03	8.75	7.76	8.43	8.2	8.39	8.15	9.2	7.92	8.37	7.37	8.14	7.68	7.7	6.86	8.81	7.64	8.11	6.72	8.17	6.79	7.64	6.57	7.77	7.1	7.52	6.84	7.41	7.86	8.23	8.13	8.5	7.95
Ba	393	622	445	462	396	468	458	434	383	427	485	454	366	356	422	586	633	592	499	527	662	626	480	398	452	380	475	627	671	584	555	569	595	589	600	637	525	470	287	348	361	416	1208	654	464
Hf	1.95	1.54	1.83	1.88	2	1.84	1.73	1.64	2.15	2.26	1.88	1.94	2.13	2.34	2.18	1.95	1.74	1.64	1.97	1.83	1.55	1.68	1.81	2.14	2.09	2.38	1.92	1.54	1.31	1.66	1.63	1.64	1.6	1.55	1.91	1.82	1.76	2.03	2.23	1.84	1.78	1.76	2.11	1.75	2.38
Ta	0.69	0.82	0.85	0.84	0.71	0.78	0.87	0.8	0.78	0.82	0.71	0.84	0.87	0.83	0.82	0.89	0.9	0.86	0.85	0.97	0.96	0.88	0.84	0.76	0.82	0.8	0.72	1.09	0.92	0.9	0.8	0.86	0.8	0.74	0.79	0.77	0.75	0.73	0.7	0.71	0.72	0.72	0.88	0.84	0.91
Pb	23.2	19.9	23.8	24	24.2	25.3	21.5	23	24.3	23.8	21.8	27.3	22.7	28.4	24.6	24.8	25.4	26.8	22.9	27.2	25.3	25.1	26.4	24.3	21.4	23.1	20.6	29	24.5	24.5	21.8	25.2	19.5	21	21.5	20.7	21.6	21.5	23.2	21.7	22.7	24	25	22.5	23.4
Th	8.67	10.8	11.6	11.4	9.67	11.1	11.4	11	9.7	9.97	8.65	11.3	10.7	10.6	10.2	12.2	12.8	13	10.9	14	12.5	11.7	11.3	10.3	10.1	10	9.23	15	11.6	12.1	10.1	11.7	9.7	10.1	9.91	9.72	9.55	9.78	9.23	10	9.79	9.82	10.2	10.7	11.3
U	4.78	2.79	3.63	4.2	3.57	4.38	3	3.4	3.66	4.07	5.21	2.64	3.17	3.86	4	3	3.17	2.92	2.8	3.47	3.19	2.81	6.06	3.99	2.77	4.71	3.59	3.43	2.96	2.99	3.52	3.43	2.45	2.77	3.57	3.71	3.99	3.56	3.14	3.98	2.69	3.67	2.36	2.92	2.47
La (ppm)	24	25.6	27.4	30.7	30.3	37.4	30.2	27.5	26.5	29.5	24.5	31	30.2	36	30.8	33.6	31.1	31.5	32.2	34.6	30.6	32.4	35.2	30	30.1	45.5	30.7	33.9	26.5	32.6	26.8	34.1	27.9	27	29.6	30.2	26.2	29	28.2	28.2	28.3	28.5	29.7	31.4	33.7
Ce	48.3	52	56.2	63	64.5	77.1	61	54.9	54	58.9	49.5	63.8	62.5	71.5	63.6	67.5	63.8	64.6	65.2	68.6	61.4	66	72.2	63	62.1	97.3	64.8	70.4	53.7	67.6	55	71.1	57.7	55.7	60.8	60.3	52.1	59	60.2	55	56.5	56.8	60.1	63.3	70.1
Pr	5.5	6.12	6.46	7.19	7.29	8.61	6.9	6.36	6.22	6.73	5.43	7.12	6.93	8.08	6.87	7.74	6.92	7.11	7.15	7.87	6.88	7.45	7.92	7.12	6.84	10.7	7.11	7.76	5.96	7.41	6.11	8.04	6.59	6.4	6.82	7.03	6.07	6.65	6.77	6.42	6.53	6.48	6.7	7.1	7.84
Nd	20.6	22.3	24.1	27.1	27.5	32	26.8	23.1	22.6	24.7	20.3	26	25.9	29.1	26	28.4	26	26.5	27.5	28.7	26	27.3	30.2	26.2	26.2	40.1	27	29	22.1	27.2	23.2	29.6	24.9	23.7	25.8	25.9	22.4	24.7	26.6	23.7	25.1	24.7	24.8	27.2	30.1
Sm	3.92	4.45	4.68	5.24	5.63	6.48	5.21	4.6	4.37	4.79	3.94	5.27	5.09	5.75	5.11	5.63	5.21	5.16	5.34	5.8	5.04	5.54	5.93	5.26	5.13	8.53	5.27	5.57	4.41	5.58	4.51	6.18	4.87	4.86	4.99	5.16	4.42	4.91	5.31	4.99	4.89	4.95	4.93	5.42	5.7
Eu	0.87	0.94	0.98	1.1	1.2	1.38	1.05	1	0.9	1.01	0.83	1.1	1.09	1.27	1.1	1.16	1.08	1.08	1.13	1.17	1.01	1.16	1.29	1.12	1.09	1.88	1.18	1.12	0.89	1.15	0.97	1.28	1.06	1.02	1.07	1.09	0.98	1.06	1.17	1.08	1.06	1.06	1.11	1.18	1.22
Gd	3.3	3.81	3.95	4.67	4.83	5.68	4.59	3.83	3.64	3.85	3.38	4.28	4.25	5.05	4.43	4.62	4.46	4.37	4.73	4.65	4.24	4.51	5.38	4.31	4.35	7.73	4.72	4.79	3.65	4.74	4.03	5.22	4.35	4.08	4.38	4.41	4.02	4.15	4.63	4.3	4.46	4.42	4.28	4.89	4.98
Tb	0.48	0.54	0.58	0.66	0.69	0.84	0.67	0.56	0.52	0.57	0.49	0.62	0.62	0.72	0.64	0.68	0.65	0.62	0.67	0.69	0.62	0.65	0.8	0.62	0.63	1.13	0.71	0.7	0.55	0.68	0.59	0.76	0.62	0.58	0.63	0.63	0.57	0.59	0.67	0.63	0.64	0.63	0.62	0.7	0.74
Dy	2.72	3.06	3.28	3.71	3.91	4.92	3.7	3.21	2.89	3.27	2.89	3.59	3.55	4.34	3.75	3.96	3.77	3.59	3.88	3.81	3.51	3.72	4.71	3.56	3.66	6.74	4.16	3.83	3.13	3.83	3.34	4.34	3.57	3.3	3.6	3.61	3.25	3.29	3.79	3.62	3.59	3.58	3.59	3.96	4.2
Ho	0.54	0.58	0.63	0.71	0.74	0.94	0.71	0.62	0.58	0.62	0.57	0.66	0.67	0.82	0.72	0.74	0.73	0.68	0.76	0.71	0.67	0.69	0.9	0.66	0.69	1.24	0.78	0.72	0.6	0.72	0.64	0.79	0.67	0.62	0.67	0.68	0.62	0.62	0.71	0.69	0.7	0.68	0.69	0.76	0.79
Er	1.56	1.65	1.77	2.02	2.13	2.59	2.09	1.74	1.59	1.79	1.59	1.88	1.87	2.32	2.03	2.08	2.05	1.89	2.13	1.99	1.89	1.93	2.58	1.83	1.97	3.54	2.26	2.02	1.68	2.02	1.83	2.22	1.9	1.72	1.91	1.98	1.77	1.79	2	1.98	1.95	1.94	2.01	2.2	2.24
Tm	0.23	0.24	0.26	0.3	0.31	0.38	0.3	0.25	0.24	0.26	0.24	0.27	0.28	0.34	0.3	0.3	0.3	0.27	0.32	0.29	0.28	0.28	0.37	0.27	0.29	0.49	0.33	0.29	0.25	0.3	0.27	0.33	0.28	0.25	0.28	0.29	0.25	0.26	0.3	0.29	0.28	0.29	0.29	0.32	0.33
Yb	1.47	1.51	1.61	1.85	1.91	2.34	1.97	1.63	1.54	1.71	1.52	1.76	1.77	2.19	1.93	1.91	1.95	1.76	2.06	1.79	1.78	1.79	2.34	1.7	1.84	3.05	2.13	1.86	1.59	1.84	1.7	1.99	1.72	1.57	1.81	1.8	1.62	1.64	1.86	1.84	1.78	1.81	1.84	1.98	2.12
Lu	0.23	0.22	0.24	0.27	0.29	0.34	0.3	0.25	0.23	0.26	0.23	0.27	0.26	0.34	0.29	0.29	0.28	0.26	0.3	0.27	0.26	0.27	0.34	0.26	0.28	0.44	0.31	0.26	0.22	0.27	0.25	0.3	0.26	0.23	0.26	0.27	0.24	0.25	0.27	0.27	0.26	0.27	0.27	0.3	0.31
Y	14.9	15.3	16.7	18.6	19.3	25.3	18.1	17	14.7	16.9	15.1	17.5	17.5	22.5	18.9	19.6	19.4	18.1	20.3	18.8	17.5	18.9	24.3	17.1	18.1	32.9	21.3	17.3	16	19.5	17.1	21.5	17.9	16.7	17.7	19.7	16.6	17	18.6	19.6	18.5	19.3	17.8	20.3	19.5
ΣREY	129	138	149	167	171	206	164	147	141	155	131	165	162	190	166	178	168	168	174	180	162	173	194	163	163	261	173	179	141	175	146	188	154	148	160	163	141	155	161	153	154	155	159	171	184
TOC (wt.%)	2.89331	1.95757	1.85149	1.92978	2.53377	2.31738	1.70798	1.68918	2.03438	1.9707	2.10593	1.56843	1.72724	2.02883	2.12283	1.52493	1.65487	1.41742	1.71647	1.45306	1.49008	1.43423	2.77788	2.16038	1.66564	2.09863	2.11215	1.50115	1.48062	1.48831	2.16701	1.56256	1.32736	1.53486	1.43149	1.88669	1.89559	2.06423	2.54694	3.34293	3.16749	2.36949	2.30384	2.41494	1.89569
TS	2.58766	2.12123	2.40833	1.62908	2.1727	1.25681	2.16667	1.70578	1.50346	1.79204	2.27002	1.34058	1.36087	1.48843	1.79466	1.15598	1.29444	1.38973	1.8624	1.09429	1.09492	1.11562	1.58221	2.25117	1.55247	1.75035	1.62545	1.22169	1.55363	1.45717	2.2054	1.50199	1.32258	1.21957	1.5023	1.33028	1.48619	1.38365	2.76792	2.29179	2.09822	2.0871	1.99627	1.83056	1.49948
Fe2O3*: total iron as Fe2O3.

## Sheet: Site 476
Table S1-3. Major, trace and rare-earth elements data of DSDP Site 476
Core- Sec.	1-1	1-2	1-3	1-4	1-5	1-6	2-1	2-2	2-3	2-4
Interval	74-76	74-76	74-76	74-76	74-76	74-76	74-76	74-76	74-76	74-76
Depth (mbsf)	0.75	2.25	3.75	5.25	6.75	8.25	9.75	11.25	12.75	14.25
SiO2 (wt.%)	50.6	51.2	47.5	49.5	50.3	50.3	52.8	47.2	48.9	46.6
TiO2	0.52	0.5	0.5	0.43	0.51	0.56	0.53	0.46	0.48	0.48
Al2O3	13.8	12.6	12.5	10.9	12.9	14.3	12.9	11.8	13.1	12.5
Fe2O3*	4.72	5.05	4.8	4.24	4.89	5.28	5.26	4.74	4.22	4.35
MnO	0.05	0.05	0.05	0.05	0.05	0.06	0.06	0.06	0.05	0.06
MgO	2.23	2.21	2.03	1.91	2.2	2.5	2.4	1.95	1.96	2.01
CaO	5.04	5.26	10.5	8.42	6.01	3.65	4.79	10.6	9.42	10.5
Na2O	3.89	3.61	3.1	3.41	3.68	3.93	3.55	3.25	3.06	3.09
K2O	3.12	2.75	2.61	2.52	2.94	3.08	2.92	2.51	2.98	2.61
P2O5	0.15	0.15	0.14	0.14	0.15	0.2	0.16	0.13	0.14	0.14
Sc (ppm)	12.2	11.8	10.8	9.89	11.4	13.1	12.4	10.6	10.6	10.8
V	86.4	85	74.5	69.3	77.3	83.7	94.4	68.5	68	76.9
Cr	69.2	66.8	62.8	57.6	60.1	65.9	64.6	50.7	43.5	54.8
Co	15.2	16.3	13	10.9	16.1	18.3	16.9	12.7	12.1	13.4
Ni	59.8	66.1	53.1	58.9	63.2	77.7	81.3	53.9	44.2	56.6
Cu	70.8	88.4	63.5	72.3	76.9	84.3	83.5	68.7	60.1	76.2
Zn	162	173	137	146	167	221	234	137	131	137
As	12	12.1	9.26	10.4	11.5	9.07	9.38	10.2	10.7	9.94
Rb	95.2	88.6	83.5	73.5	90.4	99.3	92.6	76.9	90	87.8
Sr	284	295	392	353	305	254	295	398	373	425
Zr	79.7	84.4	78.4	67.2	82.4	79.8	77.9	74.5	90.3	84.6
Nb	9.02	8.77	8.41	7.1	8.91	9.7	8.51	7.55	8.63	8.01
Mo	13	35.9	12.8	29.1	9.89	2.7	13.3	17.5	16.2	15.1
Cs	10.3	9.94	9.26	8.34	9.85	10.4	10.1	8.75	9.86	10
Ba	1615	1774	1377	1474	1602	1680	2007	1478	1199	1463
Hf	2.4	2.35	2.34	1.97	2.4	2.36	2.28	2.2	2.83	2.41
Ta	0.7	0.63	0.64	0.54	0.68	0.74	0.64	0.57	0.64	0.62
Pb	301	347	115	663	359	337	53.5	36.1	149	88.4
Th	9.2	7.95	8.28	7.13	8.37	9.9	7.98	7.55	8.77	7.82
U	10.2	9.87	13.1	11.1	8.81	6.91	9.36	12.8	7.92	9.07
La (ppm)	25.8	24	23.4	20.4	24.3	27.8	23.5	21.2	27.1	23.4
Ce	59	54.2	52.6	45.9	54.9	62	52.2	48.4	60.2	52.4
Pr	6.55	6.1	5.88	5.15	5.96	6.86	5.97	5.5	6.86	5.8
Nd	25.3	24.4	23.4	20.5	23.8	27.6	23.3	21.3	26.7	23.2
Sm	4.92	4.6	4.38	3.92	4.59	5.28	4.77	4.21	5.17	4.58
Eu	1	0.94	0.95	0.83	1	1.13	0.98	0.86	1.06	0.96
Gd	4.65	4.53	4.34	3.75	4.52	4.91	4.5	3.89	4.86	4.31
Tb	0.71	0.66	0.63	0.55	0.65	0.75	0.66	0.58	0.7	0.65
Dy	4.22	4.2	3.9	3.57	4.08	4.56	4.11	3.58	4.36	4.04
Ho	0.84	0.83	0.77	0.7	0.81	0.91	0.81	0.71	0.88	0.79
Er	2.46	2.42	2.27	2.03	2.42	2.66	2.4	2.15	2.54	2.35
Tm	0.35	0.34	0.32	0.29	0.33	0.38	0.33	0.3	0.36	0.33
Yb	2.43	2.41	2.18	1.96	2.3	2.58	2.29	2.08	2.45	2.26
Lu	0.35	0.35	0.32	0.31	0.34	0.38	0.35	0.31	0.37	0.35
Y	23.4	23.4	21.7	19.8	23.2	25.6	23.1	20.5	24.7	23.6
ΣREY	162	154	147	130	153	173	149	136	168	149
TOC (wt.%)	4.44149	4.91969	3.58735	5.87171	4.61298	4.38749	3.64788	4.22957	3.33362	4.55244
TS	1.59963	1.38075	1.66647	1.3943	1.1403	0.962911	1.33879	1.36393	1.13618	1.1977
Fe2O3*: total iron as Fe2O3.

## Sheet: Site 477
Table S1-4. Major, trace and rare-earth elements data of DSDP Site 477
Core- Sec.	2-1	2-2	2-3	3-1	3-2
Interval	74-76	74-76	74-76	74-76	74-76
Depth (mbsf)	1.75	3.25	4.75	11.3	12.6
SiO2 (wt.%)	53.4	54.1	54.9	58.3	56.6
TiO2	0.68	0.7	0.71	0.81	0.45
Al2O3	13.5	13.9	14.1	14.1	9.96
Fe2O3*	5.22	5.33	5.39	5.26	3.77
MnO	0.12	0.07	0.06	0.09	0.06
MgO	2.79	2.79	2.75	2.06	2.28
CaO	3.35	3.47	2.9	4.54	5.54
Na2O	3.95	3.75	3.58	3.41	3.18
K2O	2.75	2.73	2.84	2.82	2.11
P2O5	0.25	0.25	0.26	0.26	0.21
Sc (ppm)	10.2	10.6	11.2	8.77	8.14
V	91.7	90.4	91.4	90.1	91.1
Cr	43.3	42.9	40.8	43.5	52.7
Co	11.7	11.5	11.8	11.9	8.88
Ni	30.4	29.6	31.1	23.2	42.6
Cu	27.1	27.2	27.2	19.2	37
Zn	97.7	101	96.8	85.9	120
As	10.9	10.2	10.1	10.7	7.86
Rb	90.6	88.7	89.1	85.6	56.8
Sr	257	256	243	378	295
Zr	124	125	124	110	74.3
Nb	9.53	9.61	9.8	10	6.1
Mo	4.06	3.43	4.09	4.25	14.3
Cs	13.8	14.2	14.5	10.1	6.95
Ba	526	523	531	995	507
Hf	3.4	3.38	3.39	3.01	2.08
Ta	0.65	0.65	0.66	0.66	0.43
Pb	103	129	40.3	1205	20.3
Th	8.21	8.47	8.91	7.25	5.64
U	3.65	3.84	4.08	3.19	7.46
La (ppm)	26.5	27.1	27.8	27	18.6
Ce	57.5	59.4	59.8	56.2	40.4
Pr	6.85	6.92	7.02	6.8	4.71
Nd	25.4	26.1	26.9	26	18.2
Sm	4.9	4.79	5.08	4.94	3.23
Eu	1.11	1.13	1.16	1.25	0.77
Gd	4.1	4.36	4.39	4.28	3.04
Tb	0.63	0.63	0.65	0.62	0.44
Dy	3.66	3.84	3.89	3.8	2.7
Ho	0.69	0.72	0.74	0.7	0.53
Er	1.98	2.05	2.16	2.05	1.57
Tm	0.29	0.28	0.3	0.28	0.22
Yb	1.98	2.02	2.01	1.92	1.51
Lu	0.28	0.28	0.29	0.29	0.21
Y	20.8	21.4	20.8	20	15.2
ΣREY	157	161	163	156	111
TOC (wt.%)	2.70585	2.91149	2.70881	1.02805	3.80468
TS	1.1446	1.27548	1.04677	0.994563	1.32686
Fe2O3*: total iron as Fe2O3.

## Sheet: Site 1002
Table S1-5. Major, trace and rare-earth elements data of ODP Site 1002																	Appendix IV-11. Major, trace and rare-earth elements data of ODP Site 1002 (continued)
Core- Sec.	1-1	1-1	1-1	1-2	1-2	1-2	1-3	1-3	1-4	2-1	2-1	2-1	2-2	2-4	3-4	4-4	5-4	6-1	6-2	6-2
Interval	22-24	72-74	122-124	23-25	73-75	122-124	23-25	72-74	23-25	23-25	92-94	122-124	38-40	72-74	72-74	74-76	76-78	40-42	24-26	74-76
Depth (mbsf)	0.23	0.73	1.23	1.74	2.24	2.73	3.24	3.73	4.24	4.94	5.63	5.93	6.59	9.93	19.43	28.93	38.47	43.11	44.43	44.95
SiO2 (wt.%)	29.5	29.3	28.9	31.9	32.5	35.3	32.7	34.3	37.5	37.9	42.1	51.5	56.6	44.1	41.5	46.3	38.5	42.8	51.6	52.2
TiO2	0.45	0.45	0.45	0.5	0.51	0.55	0.53	0.53	0.39	0.53	0.65	0.83	0.92	0.7	0.67	0.78	0.65	0.68	0.6	0.72
Al2O3	11.4	11.4	11.4	12.7	12.9	13.9	12.8	12.7	8.84	12.5	15.5	18.9	19.2	14.9	15.1	17.9	16.2	16.8	13.5	15.2
Fe2O3*	4.52	4.48	4.65	4.94	4.97	5.37	5.1	5	3.56	5.22	5.56	7.11	7.16	6.24	6.24	6.64	6.43	6.21	4.86	5.25
MnO	0.04	0.03	0.04	0.04	0.05	0.04	0.03	0.03	0.02	0.04	0.06	0.07	0.04	0.05	0.08	0.09	0.05	0.04	0.03	0.03
MgO	2.15	2.06	2.06	2.12	2.04	2.14	2.02	2.05	2.07	2.13	2.47	2.33	2.04	2.54	2.55	2.37	2.07	1.95	1.86	1.72
CaO	17.8	19.2	20.4	18.3	17.3	15.6	15.7	15.4	15.8	13.4	13.4	4.21	1.58	10.9	12.7	7.59	14.6	11.3	8.27	7.57
Na2O	3.06	2.67	2.7	2.35	2.45	2.33	2.06	2.54	1.69	2.75	1.91	1.82	1.66	1.97	2.01	1.78	1.89	1.69	2.09	1.82
K2O	0.74	0.74	0.78	0.7	0.64	1.02	0.56	0.98	0.81	1.52	1.49	2.29	2.11	1.48	1.44	2.06	1.52	2.14	1.9	2.01
P2O5	0.23	0.23	0.23	0.21	0.24	0.24	0.19	0.26	0.18	0.19	0.16	0.1	0.14	0.15	0.17	0.13	0.16	0.16	0.11	0.14
Sc (ppm)	11.3	12	12	12.8	12.9	13.6	13.9	13.6	9.92	14.6	15.9	21.8	22.8	18.7	16.7	21.2	17.5	16.2	12.4	14.5
V	254	252	238	225	222	216	217	205	180	224	175	221	242	204	188	220	220	212	151	161
Cr	109	100	108	114	119	121	111	102	80.7	98.3	94.7	111	119	104	102	111	103	104	70.7	87.2
Co	8.28	8.66	8.19	8.98	9.26	10.2	10.5	9.63	7.42	12.4	14.6	18.4	19.2	15.9	13.6	20.4	12.1	12.5	9.15	10.1
Ni	62.6	62.2	63.7	65.6	70.7	74.8	77.2	79.1	63.2	80.4	58	65	68.2	60.9	49.8	65.8	65.4	71.9	48.2	55.8
Cu	26.5	26.3	25.2	25.5	25.5	26.6	28.5	27.9	23.7	32.9	34.5	42.7	50	39.8	28.3	36.7	29	29.1	19.7	20.9
Zn	93	91.9	90.8	96.4	101	104	102	106	77.7	109	123	154	161	128	114	142	125	118	90.1	103
As	7.98	8.83	9.47	13.3	12.7	10.3	9.56	7.95	6.28	7.79	4.74	9.18	7.47	11.4	12.4	15.7	26.2	17.4	8.04	13.7
Rb	62.9	63.1	62.5	69.7	73.2	79.7	78.7	73.5	53	71	85.8	108	107	82.9	87.5	103	93.9	99.8	79.7	92.9
Sr	675	705	743	706	639	621	627	585	733	664	626	272	142	555	600	420	550	456	345	379
Zr	32.2	34	35.4	37.9	39.4	39.4	42.2	43.8	38.8	44.9	62.2	75.6	81.9	61.9	57.6	67.9	51.9	53.9	52.7	68.4
Nb	7.2	7.26	7.3	7.95	7.97	8.63	8.56	8.34	6.59	7.86	10.1	12.8	13.4	9.66	10.5	11.7	10.1	11.1	10.1	13.2
Mo	87.1	92.7	88.1	55.1	78.5	62.8	110	144	112	172	3.58	2.58	1.57	5.86	64.3	4.28	62.6	94.8	63.1	25.5
Cs	4.44	4.57	4.62	4.95	5.22	5.49	5.37	5.11	3.71	4.77	6.12	7.5	6.99	5.89	6.34	7.46	6.9	7.29	5.97	6.66
Ba	218	238	252	244	303	297	305	337	220	296	292	377	376	294	283	337	297	304	235	272
Hf	0.98	1.03	1.02	1.2	1.23	1.21	1.2	1.32	1.07	1.3	1.78	2.1	2.26	1.68	1.64	2	1.5	1.65	1.51	2.03
Ta	0.53	0.56	0.53	0.6	0.6	0.64	0.63	0.61	0.48	0.55	0.71	0.89	0.91	0.69	0.73	0.85	0.71	0.81	0.72	0.94
Pb	12.4	11.9	11.7	13	13.1	14.2	14	13.9	10.4	13.6	16	19	18.6	15.6	16.2	19.8	16.1	17.7	15.4	18.9
Th	7.28	7.26	6.9	7.89	8	8.38	8.22	8.2	6.36	7.57	9.57	11.6	11.6	8.86	9.34	10.9	9.54	10.8	9.54	11.4
U	10.8	10.9	11.1	9.55	10.7	9.01	12.1	19	10.6	15.8	4.32	3.55	2.45	6.99	7.37	5.4	12.7	9.94	6.49	6.23
La (ppm)	21.7	21.6	22.2	23.8	24.3	26.6	26.6	26.1	20.1	25	32.6	39.4	38.2	28.8	31.9	35.8	30.8	35.3	29.8	36.8
Ce	42.9	43.1	43.9	47.4	47.8	51	50.3	50.7	38.4	49.2	65	79.9	76.6	57.2	63.4	70.6	59.8	67.1	57.6	71.2
Pr	5.07	5.08	5.16	5.67	5.68	6.19	6.03	6.19	4.59	5.93	7.85	9.65	9.45	7.2	7.67	8.49	7.35	8.32	6.87	8.49
Nd	18.2	19	19.3	20.7	21.2	22.7	22.5	22.1	17	22.1	28.9	34.2	34.1	25.9	27.4	30.1	25.6	29	25.8	30.3
Sm	3.53	3.63	3.67	3.78	3.81	4.29	4.24	4.26	3.22	4.03	5.65	6.58	6.5	5.25	5.44	6.1	4.92	5.51	4.79	5.67
Eu	0.68	0.68	0.68	0.74	0.77	0.82	0.84	0.84	0.65	0.84	1.08	1.29	1.39	1.09	1.08	1.25	0.93	1.07	0.88	1.04
Gd	2.61	2.64	2.79	2.88	2.91	3.21	3.2	3.26	2.57	3.4	4.27	5.15	5.32	4.37	4.29	4.68	3.68	4.08	3.39	4.16
Tb	0.37	0.38	0.39	0.43	0.41	0.47	0.45	0.45	0.38	0.48	0.62	0.72	0.75	0.65	0.62	0.69	0.51	0.57	0.48	0.57
Dy	2.2	2.21	2.23	2.49	2.51	2.69	2.84	2.68	2.17	2.96	3.69	4.39	4.47	3.75	3.61	4.15	3.01	3.29	2.66	3.24
Ho	0.41	0.41	0.45	0.47	0.48	0.51	0.5	0.54	0.41	0.55	0.71	0.84	0.84	0.71	0.71	0.8	0.59	0.62	0.51	0.59
Er	1.29	1.27	1.31	1.43	1.44	1.56	1.47	1.54	1.27	1.61	2.08	2.46	2.46	2.1	2	2.33	1.77	1.82	1.47	1.78
Tm	0.18	0.18	0.19	0.2	0.21	0.22	0.21	0.22	0.19	0.23	0.3	0.35	0.36	0.31	0.29	0.34	0.25	0.26	0.21	0.27
Yb	1.23	1.23	1.21	1.38	1.36	1.47	1.42	1.53	1.24	1.57	1.97	2.39	2.37	2.01	1.88	2.44	1.67	1.81	1.45	1.8
Lu	0.17	0.17	0.18	0.2	0.19	0.2	0.21	0.22	0.18	0.23	0.27	0.33	0.35	0.28	0.27	0.31	0.24	0.26	0.2	0.25
Y	12.4	12	12.5	13.4	14.1	14.6	13.9	15.1	12.4	15.8	19.3	22.1	22.4	20.4	19.5	21.3	16.3	17.1	13.8	16.7
ΣREY	113	113	116	125	127	137	135	136	105	134	174	210	206	160	170	189	157	176	150	183
TOC (wt.%)	10.4222	8.8072	8.98493	7.45387	6.74988	6.92622	7.41329	10.065	7.86278	7.60831	1.15212	0.305165	b.d.l	2.25358	2.91729	1.14422	3.7164	4.23736	2.23788	2.27326
TS	2.89412	2.28593	2.51799	2.04573	2.00436	2.06465	2.43344	2.11582	1.92131	2.92126	0.33427	2.03705	0.441549	1.80518	2.67689	1.27015	3.41641	2.89475	2.23109	2.15217
Fe2O3*: total iron as Fe2O3. b.d.l: below detection limit.

## Sheet: Site 1033
Table S1-6. Major, trace and rare-earth elements data of ODP Site 1033																	#NAME?
Core- Sec.	1-1	1-1	1-2	2-1	2-3	2-5	3-1	3-3	3-5	3-7	4-2	4-4	4-6	5-2	5-4	6-4	6-6	7-2
Interval	40-42	110-112	74-76	74-76	74-76	74-76	74-76	74-76	74-76	44-46	74-76	74-76	74-76	74-76	74-76	74-76	40-42	74-76
Depth (mbsf)	0.41	1.11	2.25	3.95	6.95	9.95	13.45	16.45	19.45	22.45	24.45	27.45	30.45	33.95	36.95	46.45	49.11	52.95
SiO2 (wt.%)	54.8	58.5	57.5	60.2	58.8	59.5	59.7	60.9	60.2	61.6	59.2	59.4	59.7	57.5	59.4	55.8	57	56
TiO2	0.55	0.49	0.53	0.5	0.52	0.55	0.54	0.51	0.52	0.52	0.61	0.58	0.6	0.64	0.64	0.92	0.82	0.97
Al2O3	10.1	9.12	9.55	9.14	9.38	10.1	9.86	9.33	9.42	9.53	10.7	10.5	11	11.8	11.7	16.1	14.9	16.4
Fe2O3*	5.27	4.55	4.7	4.74	4.81	5.1	5.14	4.67	4.7	4.96	5.56	5.55	5.62	6.69	5.98	7.14	7.43	8.31
MnO	0.06	0.05	0.05	0.05	0.05	0.06	0.08	0.12	0.13	0.08	0.13	0.18	0.17	0.15	0.16	0.16	0.27	0.13
MgO	2.6	2.33	2.45	2.23	2.18	2.32	2.23	2.15	2.16	2.11	2.42	2.3	2.38	2.65	2.6	3.33	3.44	3.62
CaO	1.69	1.59	1.71	1.47	2.33	1.79	2	1.89	2.08	2.16	2.02	2.57	2.49	2.43	2.5	3.96	3.11	3.4
Na2O	5.1	5.02	5.17	4.24	4.15	4.12	3.98	3.97	4.03	3.75	4.03	3.92	3.87	3.91	3.87	3.13	3.52	3.1
K2O	2.62	2.39	2.46	2.24	1.87	1.78	1.68	1.79	1.87	1.63	1.81	1.68	1.76	1.77	1.76	2.24	1.68	1.85
P2O5	0.18	0.17	0.17	0.17	0.17	0.16	0.17	0.3	0.23	0.15	0.17	0.16	0.17	0.17	0.17	0.24	0.18	0.19
Sc (ppm)	12.6	10.5	11.2	10.8	11.3	12.5	12.3	11.6	11.9	11.5	13.9	13.3	14.1	13.5	16.3	19.8	22.1	24
V	117	101	98.1	108	107	124	134	128	118	125	136	145	156	152	158	155	180	200
Cr	58.7	54	56	56	55.5	59.7	58.9	55.5	52.9	57.2	65.1	62.8	63.6	60.3	64.6	100	85.2	99.8
Co	14.1	10.4	9.19	10.7	9.45	11.4	12.2	12	11.2	10.7	13.3	13.1	14.7	21.7	20.8	22.6	24.6	25.3
Ni	35.6	31.2	30.8	35.9	32.1	35.9	38	41.2	35.2	33.9	38.8	38.6	40.5	46.5	50.6	65.5	51	62.7
Cu	35.9	29.5	28.8	30.4	28.6	30.9	33.8	29.7	28.5	31.7	32.8	35.3	35.6	37	40.4	60	63.8	74.4
Zn	77.3	69.6	67.6	74.1	67.1	74.1	76.1	87.7	68	72.2	83.3	75.3	79.9	85.5	87.4	110	84.5	99.8
As	4.66	4	3.42	3.23	3.9	3.95	2.68	3.1	3.21	3.77	3.61	4.27	3.37	3.35	4.12	4.01	5.03	6.28
Rb	38.3	35	36	35.6	35.2	35.4	35.8	34.7	33.4	33.7	39	38.4	41.9	43.9	42.1	62.1	44.2	52.5
Sr	160	147	159	146	147	149	154	159	153	154	163	168	183	178	184	304	251	242
Zr	50.4	47.3	47.9	45.4	44.1	47.7	49.6	49.6	49.1	47.9	56.7	54.2	58	56.7	57.9	91.3	47.4	58.4
Nb	6.12	5.47	5.86	5.37	5.36	5.66	5.72	5.64	5.72	5.51	6.46	6.44	6.75	6.94	6.58	9.88	6.89	8.37
Mo	28.7	35.4	30	61.1	37.3	46.4	42.2	35.6	41.2	49.7	30.7	38.5	29.1	19.2	16	0.89	5.87	0.79
Cs	2.46	2.27	2.32	2.32	2.26	2.31	2.32	2.24	2.27	2.16	2.55	2.57	2.61	2.75	2.49	3.9	2.34	2.87
Ba	320	278	298	284	272	298	290	297	276	284	336	340	371	370	389	707	524	578
Hf	1.47	1.31	1.37	1.34	1.31	1.42	1.46	1.44	1.43	1.39	1.7	1.51	1.57	1.56	1.59	2.47	1.34	1.66
Ta	0.4	0.36	0.37	0.36	0.35	0.37	0.39	0.38	0.38	0.36	0.44	0.41	0.43	0.44	0.42	0.62	0.46	0.53
Pb	12.5	8.76	7.91	7.97	7.79	8.22	8.38	8	8.14	7.95	9.38	8.79	9.34	9.36	9.52	12.7	8.94	9.63
Th	3.74	3.32	3.43	3.4	3.36	3.37	3.35	3.32	3.51	3.29	3.86	3.7	3.89	3.97	3.81	5.09	3.43	4.12
U	4.63	4.24	3.5	5.29	5.2	4.89	5.03	4.68	4.38	4.86	3.67	4.16	4.02	3.13	3	1.54	2.02	1.49
La (ppm)	13.4	12.2	12.1	12.5	12.1	12.4	12.9	12.8	12.1	12.3	14.5	13.7	15.3	15.7	17.5	22.9	16.1	18.2
Ce	27.1	25	25.7	26	24.9	26.2	27.4	27.1	25.3	26.3	30.2	28.3	31.8	34.2	35.3	45.7	32.6	37.6
Pr	3.31	3.06	3.08	3.2	3.07	3.16	3.33	3.29	3.08	3.24	3.56	3.44	3.93	4.19	4.23	5.8	4.28	4.76
Nd	13.5	12.6	13.2	13.1	12.6	13.2	13.8	13.3	12.3	12.7	14.2	13.4	15.1	16.7	16.2	22.5	16.6	19.7
Sm	2.95	2.62	2.79	2.65	2.68	2.91	2.98	2.88	2.76	2.82	3.18	2.94	3.24	3.39	3.59	4.89	3.84	4.34
Eu	0.75	0.67	0.68	0.66	0.65	0.72	0.76	0.74	0.68	0.72	0.79	0.74	0.82	0.91	0.92	1.26	1.07	1.17
Gd	2.65	2.38	2.46	2.49	2.39	2.58	2.73	2.68	2.39	2.57	2.89	2.71	2.99	3.27	3.45	4.47	3.6	4.15
Tb	0.39	0.34	0.35	0.36	0.35	0.38	0.4	0.39	0.35	0.38	0.44	0.39	0.45	0.48	0.51	0.68	0.55	0.6
Dy	2.43	2.14	2.15	2.19	2.15	2.33	2.48	2.45	2.16	2.28	2.67	2.42	2.71	2.93	3.19	3.9	3.37	3.78
Ho	0.47	0.4	0.39	0.41	0.4	0.44	0.48	0.48	0.41	0.45	0.5	0.46	0.52	0.56	0.59	0.75	0.66	0.75
Er	1.35	1.21	1.23	1.24	1.21	1.31	1.41	1.38	1.23	1.27	1.46	1.36	1.5	1.62	1.75	2.18	1.89	2.18
Tm	0.19	0.17	0.18	0.18	0.17	0.18	0.19	0.19	0.17	0.18	0.21	0.19	0.22	0.22	0.25	0.32	0.26	0.31
Yb	1.29	1.15	1.11	1.15	1.11	1.23	1.31	1.27	1.1	1.15	1.36	1.3	1.42	1.53	1.58	2.14	1.71	2.06
Lu	0.18	0.15	0.16	0.16	0.16	0.18	0.18	0.19	0.17	0.16	0.18	0.18	0.2	0.22	0.23	0.29	0.25	0.28
Y	12.6	11.6	11.2	11.7	11.7	12.1	13.1	13.2	11.7	11.7	13.9	12.7	14.8	15	17.8	21.7	17.7	20
ΣREY	82.5	75.7	76.8	77.9	75.6	79.4	83.4	82.3	75.9	78.2	90	84.2	95	101	107	140	105	120
TOC (wt.%)	3.08522	2.49559	2.56626	3.06395	3.08435	2.52584	2.59744	3.0481	2.84953	2.74378	2.40372	2.74923	2.75145	2.59194	2.46445	0.658464	1.17706	0.920575
TS	1.21749	0.935739	0.958932	1.6071	1.78962	1.59992	1.9319	1.74947	1.60245	1.56147	1.49003	1.54846	1.58709	1.40733	1.22927	0.463096	0.950318	0.434836
Fe2O3*: total iron as Fe2O3.

## Sheet: Site 1078
Table S1-7. Major, trace and rare-earth elements data of ODP Site 1078
Core- Sec.	1-1	1-3	1-5	2-1	2-3	2-5	3-1	3-3	4-2	5-2
Interval	78-80	77-79	75-79	77-79	77-79	77-79	77-79	77-79	78-80	129-131
Depth (mbsf)	0.775	3.77	6.75	8.27	11.27	14.27	17.77	20.77	28.78	38.82
SiO2 (wt.%)	41.2	45.2	52.1	45.8	47	46.9	47.3	46.4	41.6	46.5
TiO2	0.76	0.75	0.65	0.66	0.76	0.77	0.76	0.75	0.76	0.92
Al2O3	14.6	15.1	14.3	13	13.8	14.9	15.1	13.8	14.6	19.7
Fe2O3*	4.79	5.09	3.97	3.69	4.21	4.31	4.44	4.29	4.24	6.12
MnO	0.03	0.03	0.03	0.03	0.03	0.03	0.03	0.03	0.03	0.03
MgO	1.97	1.97	1.46	1.32	1.47	1.67	1.61	1.41	1.74	2.19
CaO	10.7	10.5	9.06	14.3	12.2	10.3	9.63	13.3	13.2	1.55
Na2O	2.62	2.34	2.33	2.01	2.35	2.26	2.42	2.04	1.98	2.22
K2O	1.61	2.05	2.57	2.14	2.1	2.33	2.14	2.25	1.76	2.85
P2O5	0.3	0.24	0.2	0.18	0.22	0.24	0.25	0.22	0.29	0.29
Sc (ppm)	11.7	12.2	11.1	10.5	11	10.9	11	11.4	11.9	16.3
V	126	125	83.6	75.4	88.1	99	98.8	88.4	118	195
Cr	122	121	78.4	73.2	81.4	90.7	100	79.5	114	173
Co	6.95	7.57	5.38	4.59	5.54	6.81	6.07	6.04	7.45	8.7
Ni	51.2	44.6	29.2	22.7	25.6	35.3	35.8	29.5	45.5	47
Cu	20.1	18.7	12.9	12.1	15.4	19.9	17.8	15.8	21.3	29.4
Zn	102	118	77.7	52.4	71.1	99.2	93.8	74.7	105	124
As	8.3	6.34	5.9	7.53	7	4.07	5.92	6.49	5.02	9.42
Rb	90.6	95.5	90.6	79	86.3	94.8	96.4	89.8	95.3	125
Sr	331	312	401	463	422	370	364	432	426	131
Zr	91.2	102	120	117	118	91.9	90.3	105	87.1	84.3
Nb	15.5	15.3	14.2	13.8	16.5	15.9	16.1	15.5	15.9	18.9
Mo	2.76	5.6	3.72	11.2	8.82	2.65	5.46	6.93	3.84	14.6
Cs	4.51	4.4	3.05	2.83	3.1	3.81	3.9	3.25	4.62	6.17
Ba	467	509	735	613	600	572	601	608	469	440
Hf	2.7	3.07	3.43	3.49	3.39	2.84	2.76	3.15	2.68	2.7
Ta	1	1	0.96	0.96	1.13	1.07	1.07	1.09	1.03	1.24
Pb	15.4	15.8	16.5	15.2	15.4	16.2	15.8	16.5	15.5	18.8
Th	14	14.8	12.7	12.5	13.6	13.9	14.7	14.1	14.5	18.5
U	6.83	6.01	5.3	7.82	6.15	6.06	5.94	5.94	7.88	11.2
La (ppm)	47.7	45.5	42.1	41	45	46	46.4	45.1	47.7	53.4
Ce	97.8	96.8	88.5	84.2	91.7	90.9	94.3	90	97.8	105
Pr	11.3	10.9	10.1	9.72	10.8	10.7	11.2	10.7	11.5	12.6
Nd	41.3	40.1	37.1	35.6	39.8	38.9	39.3	38.2	40.2	42.6
Sm	6.59	6.53	6.05	5.66	6.35	6.15	6.54	6.27	6.94	7.27
Eu	1.45	1.41	1.32	1.27	1.35	1.33	1.36	1.35	1.48	1.48
Gd	5.39	5.22	4.69	4.49	4.97	4.74	5.08	4.9	5.58	5.19
Tb	0.73	0.71	0.63	0.61	0.68	0.64	0.71	0.68	0.75	0.67
Dy	4.31	4.16	3.64	3.61	3.82	3.7	3.89	3.99	4.35	3.78
Ho	0.82	0.79	0.68	0.67	0.73	0.7	0.72	0.72	0.81	0.7
Er	2.32	2.23	1.99	1.9	2.06	2.05	2.1	2.08	2.3	1.96
Tm	0.31	0.3	0.28	0.26	0.29	0.28	0.28	0.28	0.32	0.27
Yb	2.08	2.06	1.87	1.8	1.93	1.87	1.99	1.95	2.06	1.79
Lu	0.3	0.3	0.27	0.25	0.28	0.28	0.27	0.29	0.29	0.25
Y	22.5	21.7	19	18.4	20.5	19.6	20.1	19.9	22.4	17.4
ΣREY	245	239	218	209	230	228	234	226	244	255
TOC (wt.%)	5.56824	3.19358	2.22871	3.10179	3.36241	3.64982	4.64095	2.74349	5.2699	6.98037
TS	1.25299	1.09967	0.996597	1.29448	1.0476	1.42002	1.26757	1.26915	1.42556	1.75529
Fe2O3*: total iron as Fe2O3.

## Sheet: Site 1084
Table S1-8. Major, trace and rare-earth elements data of ODP Site 1084
Core- Sec.	1-1	1-2	2-1	2-3	2-5	3-1	3-3	3-5	5-1	5-4
Interval	74-76	74-76	74-76	74-76	74-76	74-76	74-76	74-76	101-103	74-76
Depth (mbsf)	0.74	2.24	3.74	6.74	9.74	13.24	16.24	19.24	32.51	36.64
SiO2 (wt.%)	10.9	20	26.1	25.2	28.3	24.5	29.7	33.9	40.6	13.3
TiO2	0.13	0.26	0.36	0.34	0.33	0.34	0.38	0.35	0.47	0.17
Al2O3	2.83	5.66	8.15	7.61	7.75	7.48	8.39	8.52	11.4	3.8
Fe2O3*	1.28	2.65	3.98	3.51	3.62	3.52	4.48	4.06	5.02	1.74
MnO	0.009	0.02	0.02	0.02	0.02	0.02	0.02	0.02	0.02	0.01
MgO	1.02	1.49	1.9	1.78	1.74	1.72	2	1.88	2.34	1.11
CaO	41.1	30.2	20.1	22.8	19.6	25.8	15.5	13.2	2.11	39.2
Na2O	0.04	0.97	2.22	1.8	1.98	1.54	2.22	2.04	3.31	0.2
K2O	0.01	0.38	0.35	0.44	0.35	0.52	0.57	1.05	2.29	0.09
P2O5	0.13	0.19	0.2	0.2	0.18	0.18	0.22	0.18	0.22	0.21
Sc (ppm)	5.16	8.87	12.9	11.1	11.4	11.3	12.1	11.4	16.5	5.78
V	30	43.4	56.9	51.2	55.4	52	66.2	69.2	91.7	35.5
Cr	45.4	95.9	122	123	117	110	135	120	165	73.7
Co	2.74	4.65	7.67	6.47	6.35	6.28	7.75	7.36	9.26	3.57
Ni	46.4	76.9	93.6	83.5	84.7	78.6	112	104	132	58.6
Cu	50.1	57.8	87.8	75.2	84.3	64.8	116	100	124	60.1
Zn	55.9	83	127	109	106	94.3	183	122	176	68.5
As	5.24	6.54	10.1	5.98	7.56	7.48	10.8	9.73	13.3	3.39
Rb	24	47.2	68.1	64.5	65.2	61.5	69.6	74.1	100	30.4
Sr	1282	873	600	642	558	717	460	404	139	1098
Zr	20.5	38.1	53.3	48.5	51.7	47.2	56.5	54.1	73.7	29.9
Nb	2.01	4	5.41	5.12	5.15	5	5.82	5.59	7.43	2.71
Mo	18.9	25.4	37.6	38.3	43.4	27.2	44.7	41	72.2	18.8
Cs	1.65	3.6	5.32	5.04	5.17	4.82	5.43	5.9	7.55	2.24
Ba	1205	917	1135	569	880	1127	1566	823	1760	876
Hf	0.57	1.15	1.7	1.47	1.57	1.48	1.63	1.65	2.22	0.76
Ta	0.16	0.31	0.43	0.4	0.4	0.39	0.45	0.44	0.56	0.2
Pb	1.89	3.44	6.09	5.38	5.2	4.74	7.1	6.69	9.74	2.51
Th	2.7	5.01	6.64	6.08	6.17	5.74	6.4	6.4	8.78	3.21
U	16.2	12.5	18	17.5	24.1	12.5	18.3	18.3	26.5	10.1
La (ppm)	10.5	16.7	20.4	19.6	19.4	18.3	20	19	25.3	12
Ce	15.7	26.5	34.2	31.8	32.2	30	34.4	34	43.7	18.6
Pr	2.55	4.16	5.16	4.78	4.91	4.56	5.06	4.7	6.14	2.98
Nd	9.79	15.7	18.9	17.9	18.1	17.6	18.7	17.4	23.1	11.3
Sm	1.99	3.11	3.82	3.55	3.46	3.42	3.64	3.3	4.49	2.15
Eu	0.43	0.65	0.8	0.73	0.74	0.7	0.74	0.65	0.91	0.48
Gd	1.94	3.11	3.72	3.44	3.43	3.36	3.39	3.05	4.26	2.21
Tb	0.31	0.46	0.54	0.51	0.5	0.49	0.51	0.47	0.64	0.34
Dy	1.89	2.89	3.4	3.32	3.3	3.17	3.4	3.05	4.18	2.25
Ho	0.42	0.6	0.69	0.68	0.67	0.64	0.69	0.61	0.85	0.48
Er	1.24	1.79	2.07	1.99	1.96	1.92	2.05	1.87	2.46	1.4
Tm	0.18	0.24	0.28	0.28	0.27	0.27	0.29	0.26	0.35	0.2
Yb	1.22	1.67	2	1.97	1.86	1.85	2.04	1.84	2.44	1.37
Lu	0.19	0.24	0.29	0.28	0.28	0.28	0.3	0.28	0.36	0.2
Y	13.8	18.7	21.2	20.8	19.3	19.9	20.6	18.2	25.3	15.4
ΣREY	62.1	96.6	117	112	110	106	116	109	145	71.3
TS (wt.%)	1.04773	1.47217	1.68504	1.42847	1.89751	1.41015	1.70944	1.75672	2.82913	1.05569
Fe2O3*: total iron as Fe2O3.

## Sheet: Site M0059
Table S1-9. Major, trace and rare-earth elements data of DSDP Site M0059
Core- Sec.	1-1	1-1	1-2	2-2	3-1	3-2	4-1	4-2
Interval	38-40	108-110	40-42	77-79	77-79	65-67	73-75	77-79
Depth (mbsf)	0.38	1.08	1.9	4.07	5.87	7.25	9.13	10.67
SiO2 (wt.%)	50.8	48	49.5	52.4	49.4	49.1	50.7	49.5
TiO2	0.63	0.59	0.58	0.56	0.52	0.54	0.6	0.54
Al2O3	11.3	10.7	10.5	10.3	9.62	10.1	10.9	9.95
Fe2O3*	6.04	5.4	5.08	4.35	4.88	4.69	5.57	4.93
MnO	0.26	0.4	0.36	0.14	0.14	0.39	0.4	0.15
MgO	2.47	2.45	2.22	2.21	2.19	2.26	2.32	2.18
CaO	1.87	2.04	2.48	1.36	1.61	1.89	1.96	2.06
Na2O	3.62	3.48	3.07	3.06	2.96	2.95	2.78	2.84
K2O	3.08	3.04	2.75	2.69	2.61	2.59	2.76	2.65
P2O5	0.26	0.31	0.29	0.24	0.26	0.29	0.29	0.25
Sc (ppm)	13.2	12.1	11.7	11.2	10.8	11.3	11.9	10.4
V	121	120	113	114	119	112	120	117
Cr	80.7	78.4	79.2	80.9	81.2	76.6	80.6	78
Co	18.5	17.1	15.1	11.8	13.9	13.7	16	14
Ni	43.8	40.6	37.2	36.9	38.3	38.3	44	41
Cu	36	27.9	26.4	26	27.3	23	26.1	27.9
Zn	212	114	89.1	89	90	84.5	86	81
As	10.9	9.51	13.9	8.01	7.01	8.57	7.95	8.37
Rb	103	97.2	97.5	95.9	87.1	91.8	101	89.7
Sr	140	149	156	122	126	138	140	132
Zr	118	104	111	105	97.8	99.3	106	101
Nb	12.8	11.6	11.5	11.2	10.2	10.9	12.2	10.6
Mo	2.16	4.59	4.43	8.93	16.4	4.46	6.7	13.5
Cs	5.77	5.64	5.47	5.47	4.98	5.13	5.55	5.02
Ba	310	300	291	319	289	277	329	312
Hf	3.12	2.86	3.1	2.98	2.68	2.73	3.02	2.81
Ta	0.82	0.75	0.77	0.76	0.68	0.71	0.85	0.7
Pb	78.1	44.3	37.9	25.5	18.5	31.4	21.7	18.7
Th	9.27	9.01	9.12	9.01	8.49	8.58	9.56	8.44
U	2.66	2.49	2.68	3.91	3.69	2.54	3.01	3.48
La (ppm)	37.8	35.3	35.4	33.2	32.8	34.1	36.6	33.5
Ce	77	74.3	72.7	69.2	67.2	69.8	75	69.1
Pr	8.96	8.73	8.53	8.09	7.96	8.22	8.93	8.13
Nd	33.8	32.3	32.8	31.4	30.4	30.8	33.2	30.8
Sm	6.49	6.31	6.21	5.95	5.81	5.85	6.32	5.91
Eu	1.25	1.25	1.25	1.15	1.14	1.15	1.25	1.17
Gd	5.53	5.48	5.38	5.07	4.99	5.06	5.56	5.14
Tb	0.82	0.78	0.76	0.76	0.74	0.73	0.81	0.77
Dy	4.69	4.54	4.46	4.31	4.22	4.42	4.74	4.35
Ho	0.93	0.91	0.89	0.84	0.84	0.88	0.94	0.87
Er	2.62	2.56	2.51	2.41	2.34	2.44	2.67	2.46
Tm	0.38	0.36	0.37	0.34	0.34	0.34	0.38	0.35
Yb	2.54	2.41	2.44	2.34	2.26	2.35	2.55	2.38
Lu	0.35	0.36	0.35	0.34	0.32	0.34	0.37	0.34
Y	24.5	22.7	22.2	20.5	21	21.6	23.3	21.8
ΣREY	208	198	196	186	182	188	202	187
TOC (wt.%)	4.12589	4.16442	4.07174	4.37677	5.25958	5.09964	4.3519	5.24766
TS	1.99976	2.07138	2.4703	2.15769	2.7354	1.88938	1.95428	2.61353
Fe2O3*: total iron as Fe2O3.

## Sheet: Site M0061
Table S1-10. Major, trace and rare-earth elements data of DSDP Site M0061
Core- Sec.	1-1	1-1	1-2	2-1	2-2	3-1	3-2	4-1
Interval	42-44	117-119	42-44	83-85	73-75	110-112	42-44	77-79
Depth (mbsf)	0.42	1.17	1.92	4.13	5.53	7.7	8.52	10.67
SiO2 (wt.%)	59.3	57.5	56.9	55.3	57	58.4	58.9	66.6
TiO2	0.8	0.8	0.8	0.76	0.74	0.72	0.79	0.82
Al2O3	15.3	15.2	14.6	14.5	14.5	15.5	16.4	13.7
Fe2O3*	6.99	7.5	7.6	7.47	6.77	7.24	7	5.49
MnO	0.13	0.13	0.17	0.16	0.14	0.08	0.08	0.08
MgO	2.66	2.76	2.73	2.62	2.47	2.48	2.72	1.87
CaO	1.97	1.92	1.95	1.92	2.05	2.03	2.1	2.38
Na2O	2.48	2.42	2.4	2.41	2.5	2.89	2.75	2.5
K2O	3.56	3.45	3.31	3.38	3.36	3.63	3.78	3.18
P2O5	0.2	0.32	0.49	0.21	0.2	0.19	0.18	0.2
Sc (ppm)	16.1	15.9	16	15.5	14.8	15.5	16.2	14.7
V	120	119	122	120	106	109	114	89.2
Cr	104	101	104	103	95.8	92.5	103	77.2
Co	20.4	20.4	20.7	21.6	19.5	15.2	20.8	14.7
Ni	53.4	52.2	54.1	55	52.7	37.8	51.9	34.7
Cu	29	26.9	26.6	37.4	35.3	33.2	46.9	24
Zn	131	121	123	123	114	108	128	84.6
As	9.87	11.2	9.51	10.2	9.82	12.5	11.1	7.56
Rb	142	138	130	137	139	157	157	134
Sr	156	151	150	152	152	184	174	158
Zr	125	115	118	125	138	132	138	144
Nb	16.2	15.6	15.7	15.1	14.5	15.2	15.7	17
Mo	2.65	3.72	4.09	18.2	30.5	1.82	1.27	1.22
Cs	6.64	6.6	6.35	6.49	6.48	6.27	6.4	5.97
Ba	607	588	590	642	637	693	705	561
Hf	3.56	3.36	3.41	3.65	3.98	3.79	4.06	4.14
Ta	1.18	1.09	1.1	1.08	1.06	1.12	1.1	1.36
Pb	22.8	22	20.6	22.5	19.7	21.7	25.1	19.8
Th	12.2	12.2	12.6	13.8	14.5	14.7	16	9.86
U	4.15	4.14	4.3	5.47	6.57	3.32	4.37	3.73
La (ppm)	47.7	46.2	48.4	53.6	52.3	45	54.5	43.2
Ce	99	96.8	102	111	110	92.6	114	93.9
Pr	12.2	11.7	12.5	13.8	13.5	11.4	13.4	11.1
Nd	43.6	42.2	45.2	48.2	47.9	40.8	46.9	40.9
Sm	8.42	8.15	8.53	9.35	9.31	7.96	9.08	8.41
Eu	1.52	1.47	1.52	1.62	1.59	1.35	1.55	1.42
Gd	7.19	6.87	7.36	7.8	7.73	6.22	7.62	6.94
Tb	1.02	0.97	1.02	1.09	1.1	0.91	1.1	1
Dy	5.81	5.59	5.77	6.23	6.18	5.26	6.24	5.83
Ho	1.15	1.08	1.13	1.21	1.21	1.04	1.23	1.16
Er	3.14	3.04	3.15	3.41	3.33	2.98	3.44	3.27
Tm	0.46	0.44	0.45	0.48	0.48	0.42	0.49	0.45
Yb	3.02	2.97	2.98	3.25	3.23	2.89	3.22	3.06
Lu	0.44	0.42	0.42	0.47	0.47	0.41	0.47	0.44
Y	28.7	27.3	28.6	31.6	30.8	26.2	31.8	29.5
ΣREY	263	255	269	293	289	245	295	250
TOC (wt.%)	0.747615	0.856774	1.1366	1.6228	1.58769	0.773001	0.654187	0.1909
TS	1.14075	1.39816	1.68749	2.35196	2.21088	1.04435	0.40689	0.261046
Fe2O3*: total iron as Fe2O3.

[truncated: 2 more sheets: Site M0063, Site M0065]
