# Supplementary material
Source: MDPI journal article supplement (https://www.mdpi.com/2075-163X/10/11/1021)

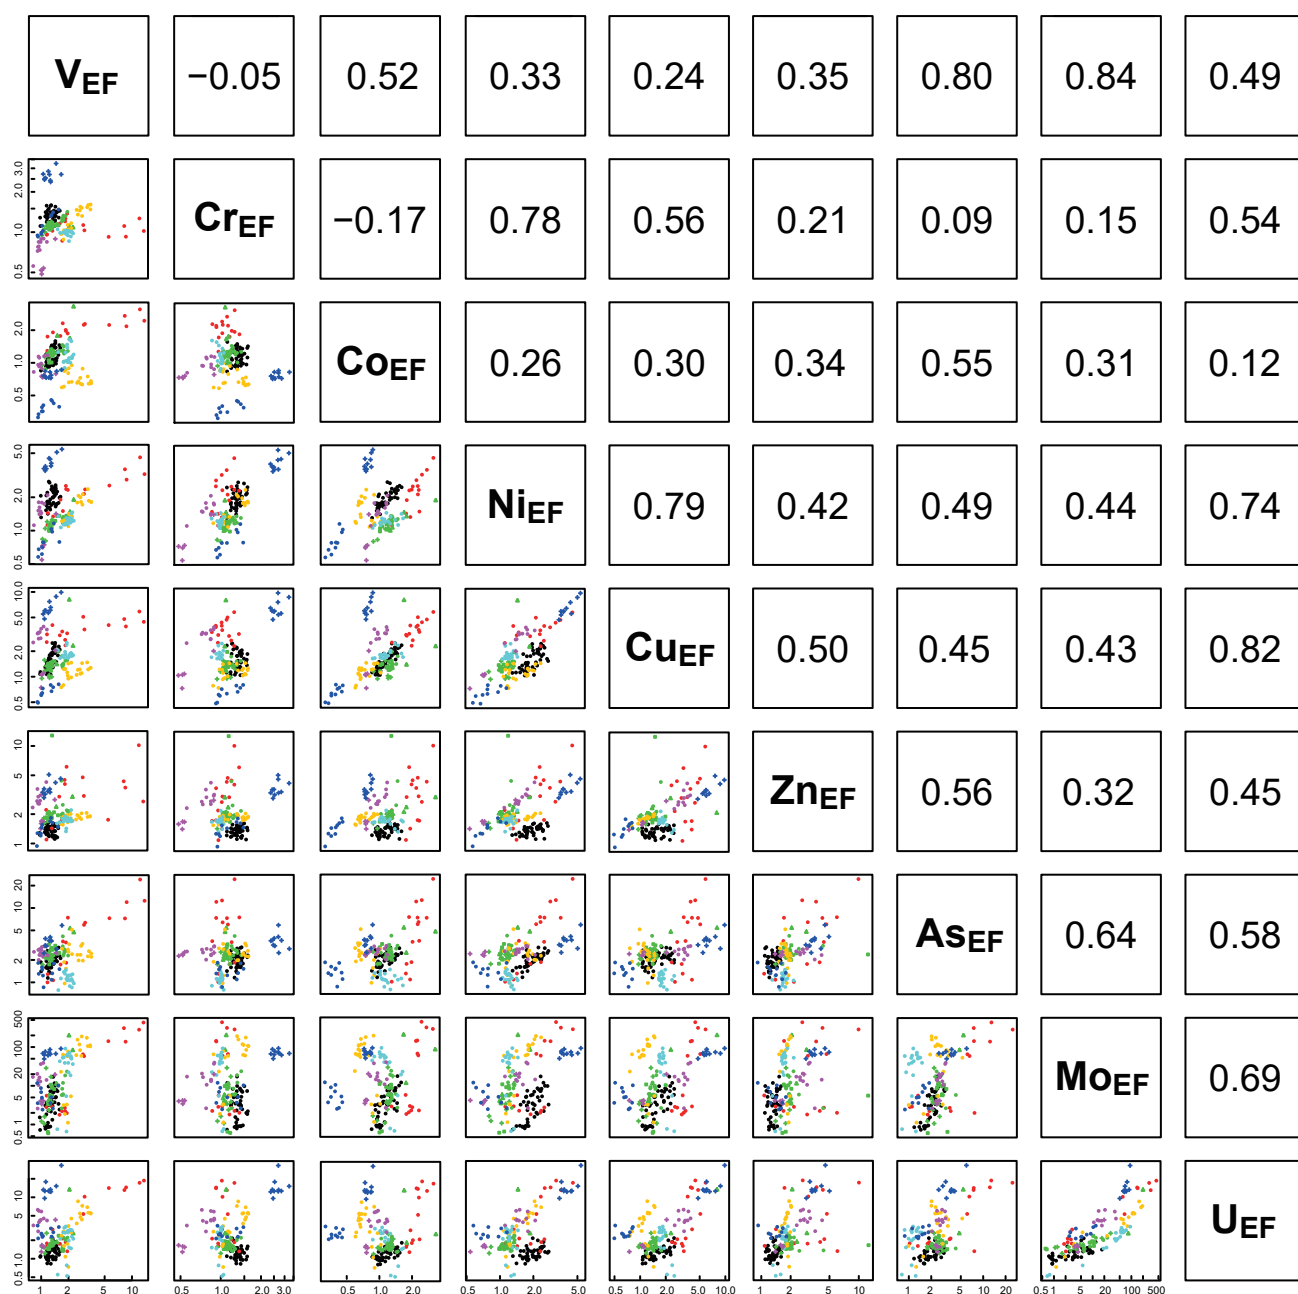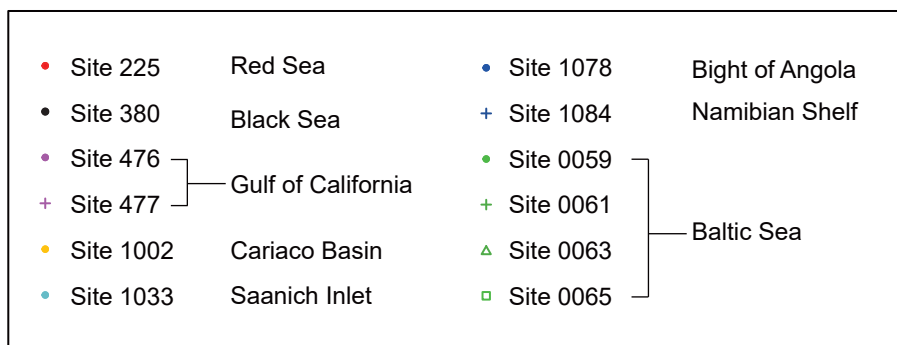

Figure S1

Supplement: s1 [file s1 › 201026yano_supplementary_files/201026yano_FigureS1.pdf]
